# Supplementary material
Source: Springer Nature journal article supplement (https://www.springermedizin.de/resource/supplementary/12885_2011_3006_MOESM8_ESM.pdf/9463488)

# A

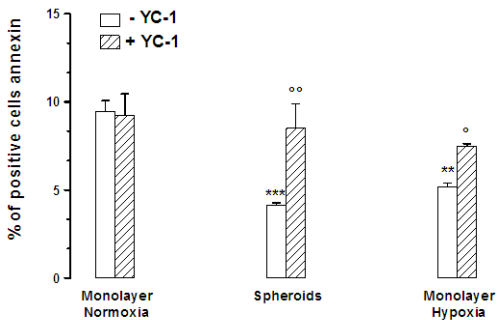

# B

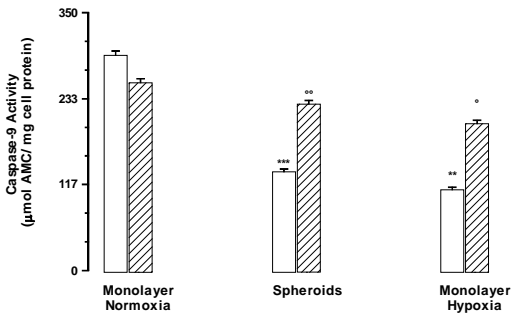

Supplement: MOESM8 [file 9463488]
